# Supplementary material for: Identification and Characterization of Antibiotic-Resistant, Gram-Negative Bacteria Isolated from Korean Fresh Produce and Agricultural Environment
Source: MDPI journal article supplement (doi:10.3390/microorganisms11051241), 2023-05-08
Supplement: s1 [file s1]

# **RAPD**

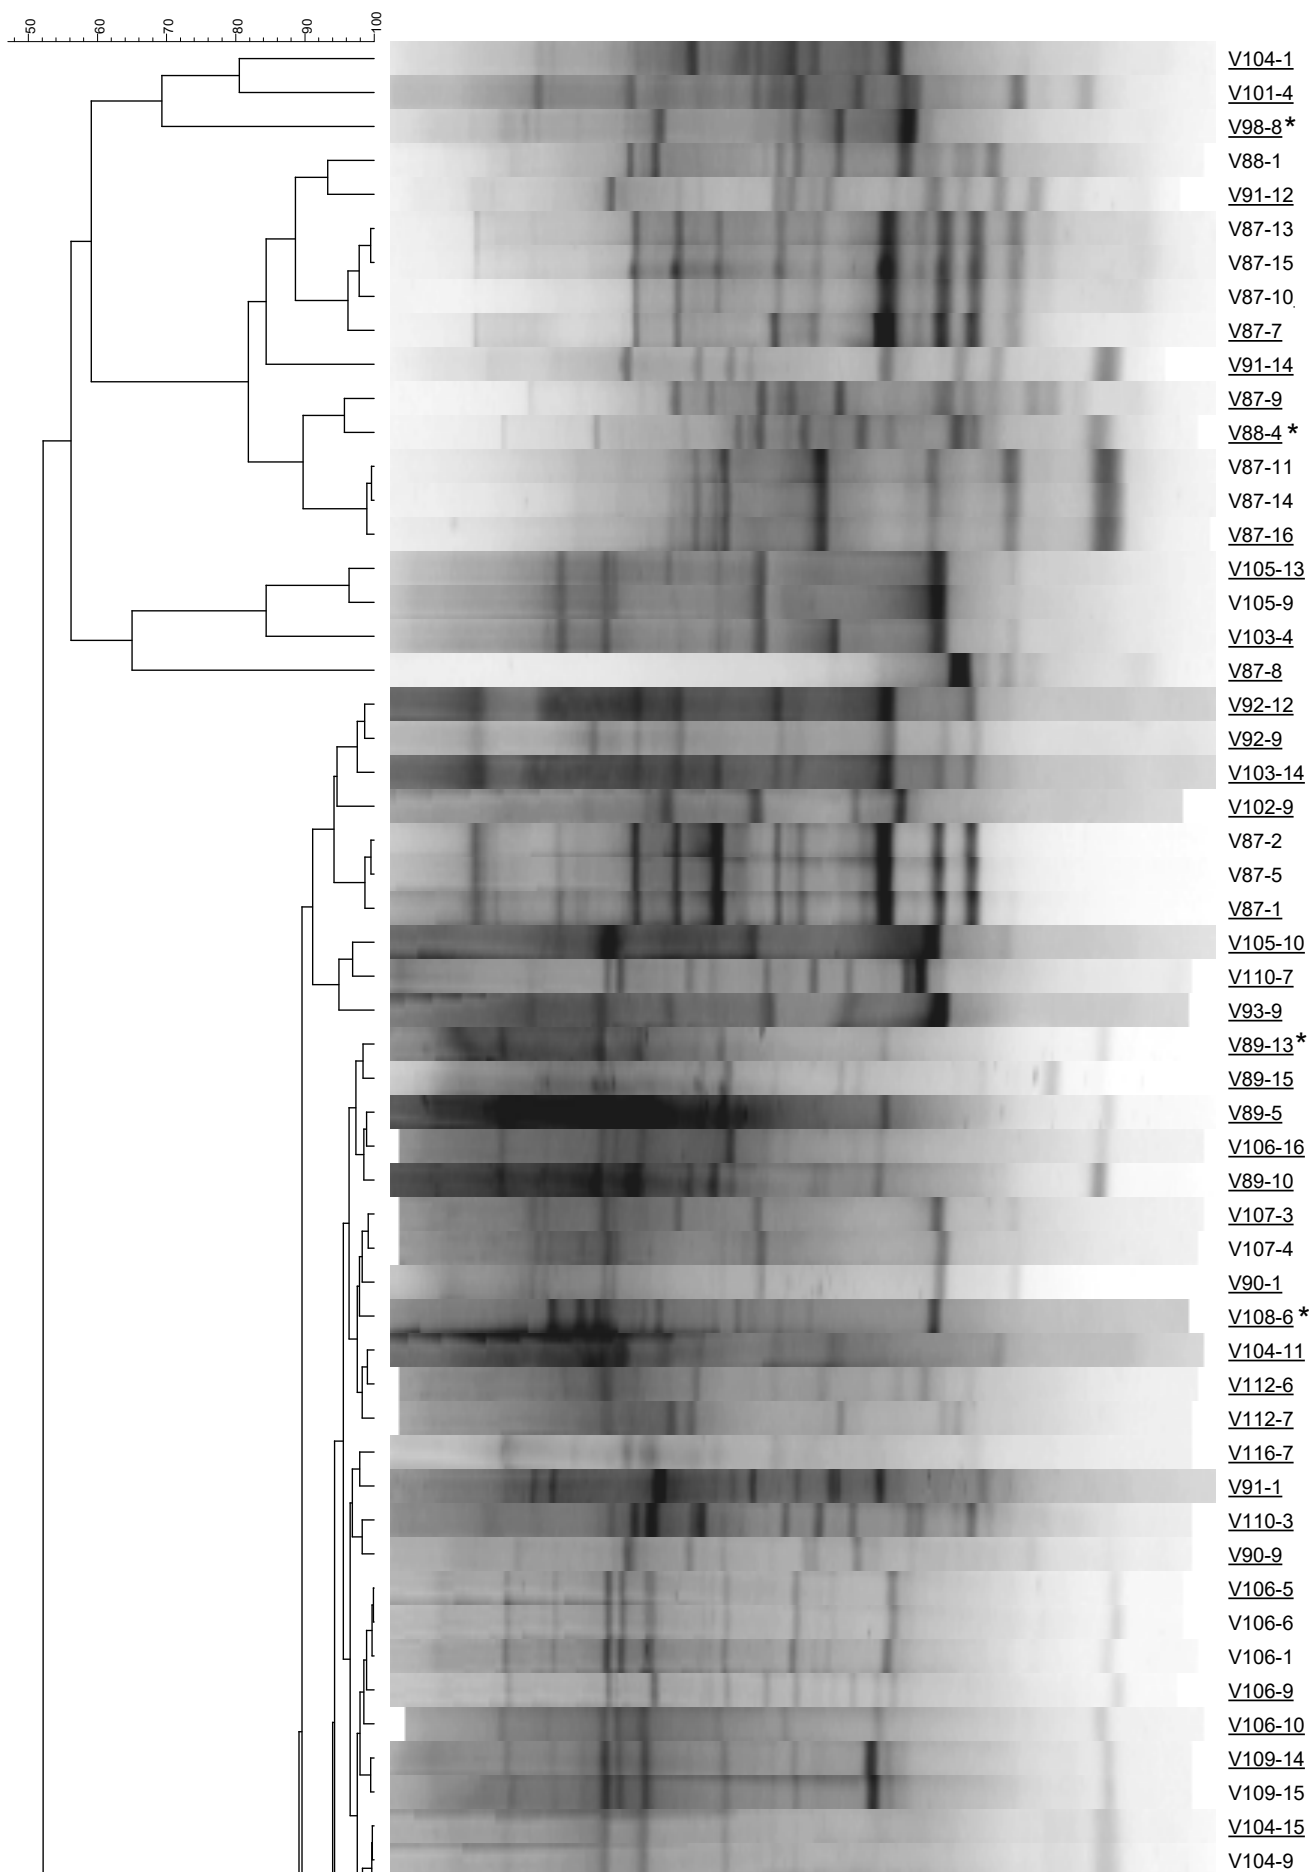

|  |                  |
|--|------------------|
|  | V104-14          |
|  | <u>V110-4</u>    |
|  | <u>V103-12</u>   |
|  | <u>V113-5</u>    |
|  | <u>V113-2</u>    |
|  | <u>V107-8</u>    |
|  | <u>V107-9</u>    |
|  | <u>V104-12</u>   |
|  | <u>V104-8</u>    |
|  | <u>V102-8</u>    |
|  | <u>V88-15</u>    |
|  | <u>V92-6</u>     |
|  | <u>V107-11</u>   |
|  | <u>V107-14</u>   |
|  | <u>V90-13</u>    |
|  | <u>V91-2</u>     |
|  | <u>V91-9</u>     |
|  | <u>V108-9</u>    |
|  | <u>V86-2</u>     |
|  | <u>V86-8</u>     |
|  | <u>V86-11</u>    |
|  | <u>V89-1</u>     |
|  | <u>V106-11</u> * |
|  | <u>V108-7</u>    |
|  | <u>V90-5</u>     |
|  | <u>V106-3</u>    |
|  | <u>V108-4</u>    |
|  | <u>V93-10</u>    |
|  | <u>V91-6</u>     |
|  | <u>V93-11</u>    |
|  | <u>V93-14</u>    |
|  | <u>V87-6</u>     |
|  | <u>V106-4</u>    |
|  | <u>V103-11</u>   |
|  | <u>V103-1</u>    |
|  | <u>V103-15</u>   |
|  | <u>V86-16</u>    |
|  | <u>V103-8</u>    |
|  | <u>V86-14</u>    |
|  | <u>V90-4</u> *   |
|  | <u>V112-1</u>    |
|  | <u>V102-15</u>   |
|  | <u>V88-12</u>    |
|  | <u>V97-8</u>     |
|  | <u>V105-4</u>    |
|  | <u>V114-8</u>    |
|  | <u>V114-6</u>    |
|  | <u>V115-2</u>    |
|  | <u>V116-8.2</u>  |
|  | <u>V116-6.2</u>  |
|  | <u>V116-6.1</u>  |
|  | <u>V116-8.1</u>  |
|  | <u>V109-10</u>   |
|  | <u>V109-2</u>    |
|  | <u>V109-1</u>    |
|  | <u>V109-16</u>   |

|  |  |                 |
|--|--|-----------------|
|  |  | <u>V108-11</u>  |
|  |  | V108-15         |
|  |  | <u>V98-6</u>    |
|  |  | <u>V113-4</u>   |
|  |  | <u>V116-1</u>   |
|  |  | <u>V91-4B</u>   |
|  |  | V91-4S          |
|  |  | <u>V98-7</u>    |
|  |  | <u>V109-7</u>   |
|  |  | V109-3          |
|  |  | <u>V109-5</u>   |
|  |  | <u>V109-11</u>  |
|  |  | V86-13          |
|  |  | V86-15          |
|  |  | <u>V86-10</u>   |
|  |  | V86-6           |
|  |  | V86-3           |
|  |  | V86-4           |
|  |  | V86-1           |
|  |  | V86-9           |
|  |  | <u>V86-12</u>   |
|  |  | <u>V113-1</u>   |
|  |  | <u>V90-14 *</u> |
|  |  | <u>V91-7</u>    |
|  |  | <u>V89-3</u>    |
|  |  | <u>V89-12</u>   |
|  |  | <u>V115-4</u>   |
|  |  | <u>V90-2</u>    |
|  |  | <u>V108-8</u>   |
|  |  | <u>V108-13</u>  |
|  |  | <u>V116-3</u>   |
|  |  | <u>V90-7</u>    |
|  |  | <u>V91-3</u>    |
|  |  | <u>V104-7</u>   |
|  |  | <u>V104-2</u>   |
|  |  | <u>V110-1</u>   |
|  |  | <u>V90-16</u>   |
|  |  | <u>V89-11 *</u> |
|  |  | <u>V104-4</u>   |
|  |  | <u>V89-4 *</u>  |
|  |  | V105-15         |
|  |  | <u>V105-16</u>  |
|  |  | <u>V115-8 *</u> |
|  |  | <u>V106-7</u>   |
|  |  | <u>V103-13</u>  |
|  |  | <u>V105-1</u>   |
|  |  | <u>V105-12</u>  |
|  |  | <u>V110-5</u>   |
|  |  | <u>V106-15</u>  |
|  |  | <u>V106-12</u>  |
|  |  | <u>V106-13</u>  |
|  |  | <u>V102-7</u>   |
|  |  | <u>V97-9</u>    |
|  |  | <u>V116-2</u>   |
|  |  | <u>V102-4</u>   |
|  |  | <u>V98-5</u>    |

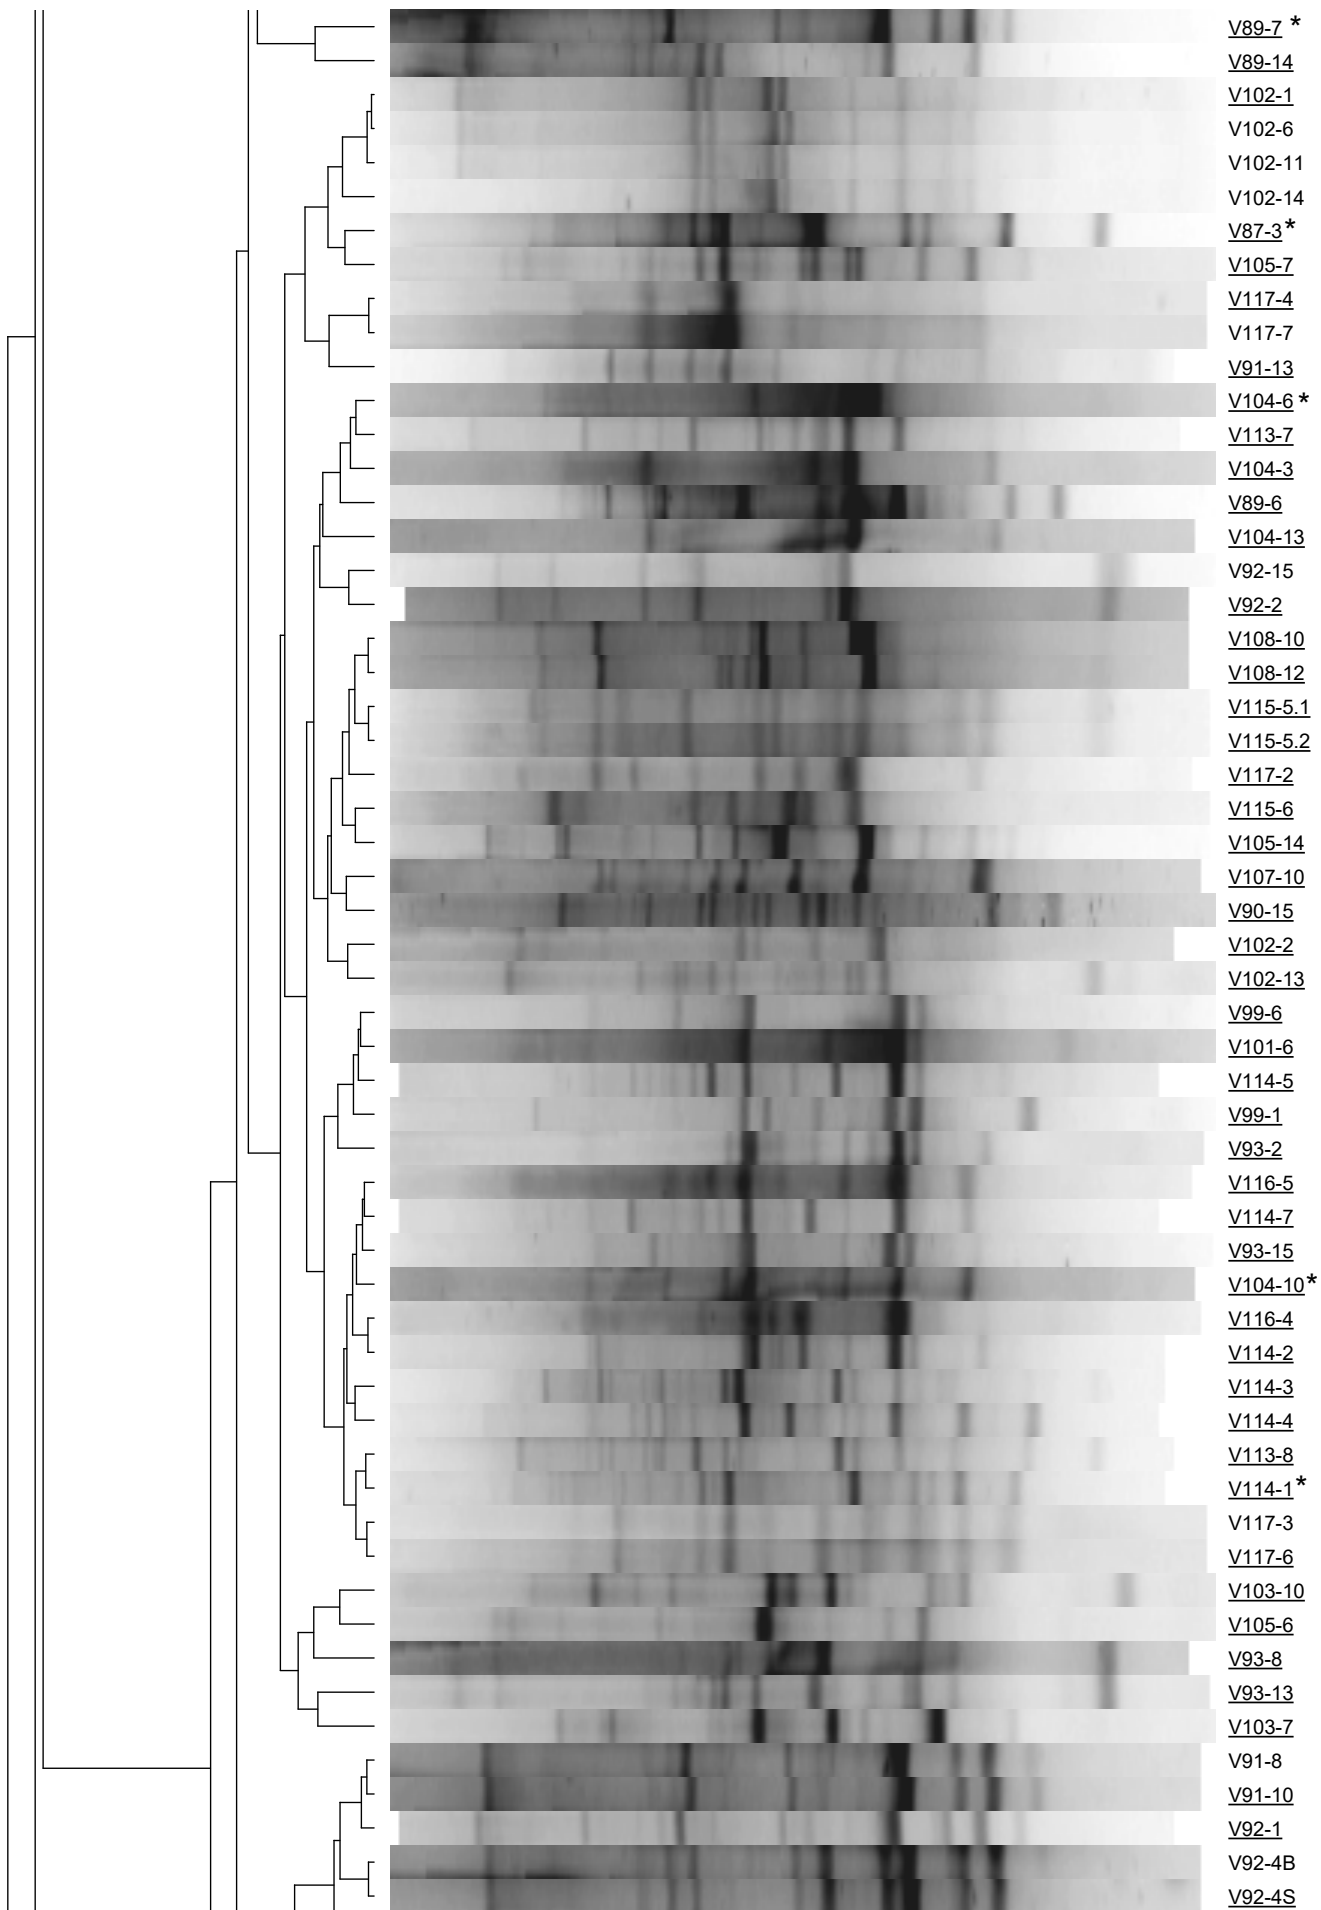

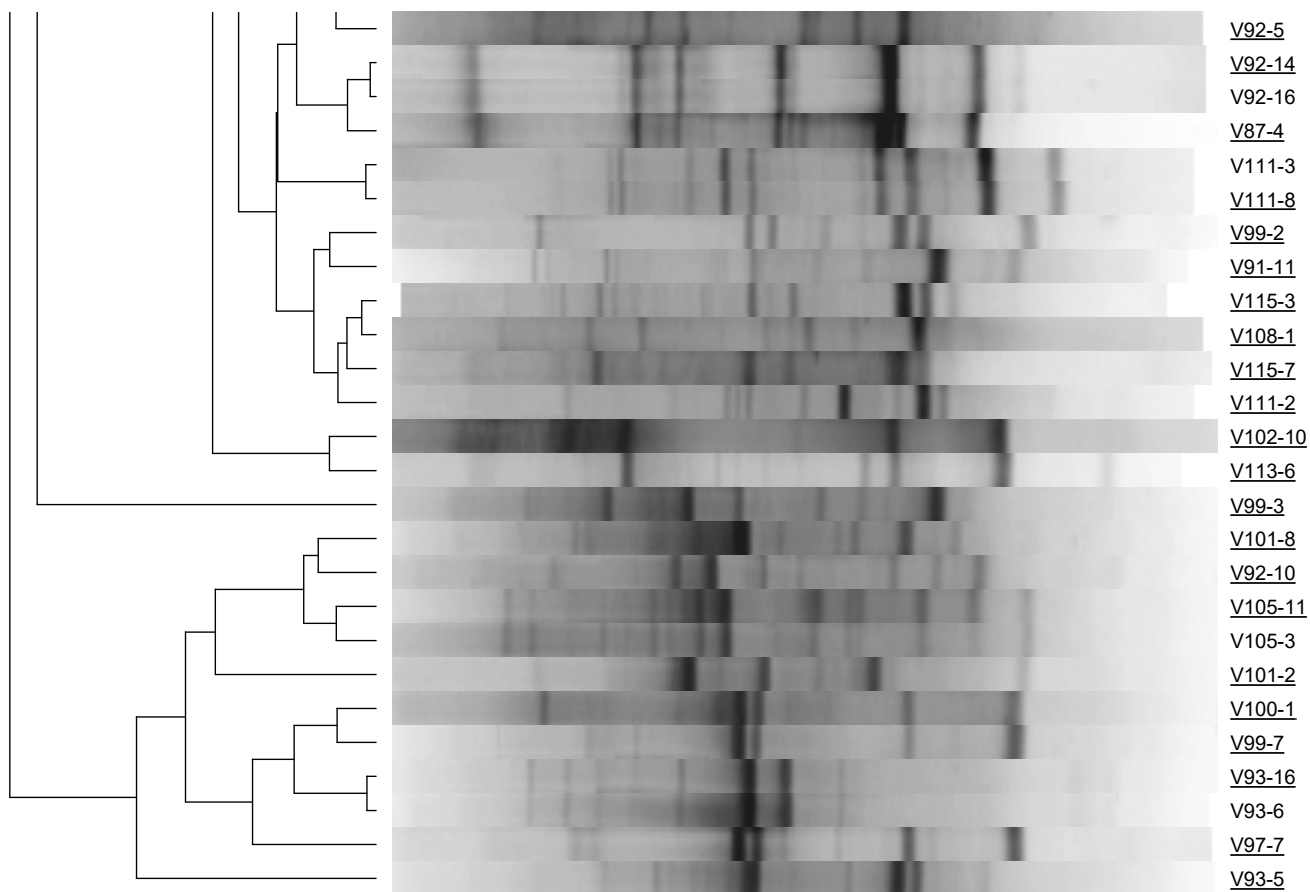

Figure S1: Dendrogram obtained by UPGMA clustering using the Pearson correlation coefficient of RAPD-PCR fingerprints of 248 Gram-negative isolates from lettuces and different fertilized soil samples. Selected strains for 16S rRNA gene sequencing were marked with an under bar. \*; selected isolates for whole genome sequencing.
